# Supplementary material for: Water stable nanocoatings of poly(N-isopropylacrylamide)-based block copolymers on culture insert membranes for temperature-controlled cell adhesion
Source: Royal Society of Chemistry journal article supplement (doi:10.1039/d0tb01113d), 2020-01-01
Supplement: d0tb01113d1.pdf [file d0tb01113d1.pdf]

## Supplementary Information

### Water Stable Nanocoatings of Poly(*N*-isopropylacrylamide)-based Block Copolymers on Culture Insert Membrane for Temperature-Controlled Cell Adhesion

Masamichi Nakayama,<sup>\*a</sup> Yuki Toyoshima,<sup>b</sup> Hiroshi Chinen,<sup>b</sup> Akihiko Kikuchi,<sup>b</sup> Masayuki Yamato<sup>a</sup>  
and Teruo Okano<sup>a</sup>

<sup>a</sup> Institute of Advanced Biomedical Engineering and Science, Tokyo Women's Medical University,  
8-1 Kawada-cho, Shinjuku, Tokyo 162-8666, Japan.

<sup>b</sup> Department of Materials Science and Technology, Graduate School of Industrial Science and  
Technology, Tokyo University of Science, 6-3-1 Nijuku, Katsushika, Tokyo 125-8585, Japan

\*Corresponding author: nakayama.masamichi@twmu.ac.jp

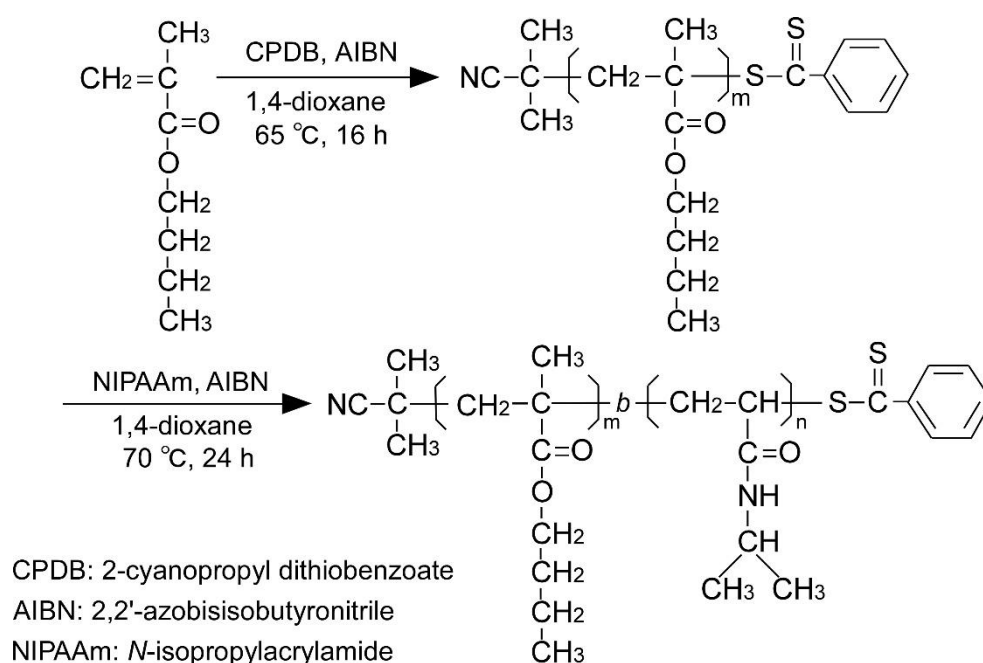

**Fig. S1** Synthetic pathway of poly(n-butyl methacrylate)-*b*-poly(*N*-isopropylacrylamide).

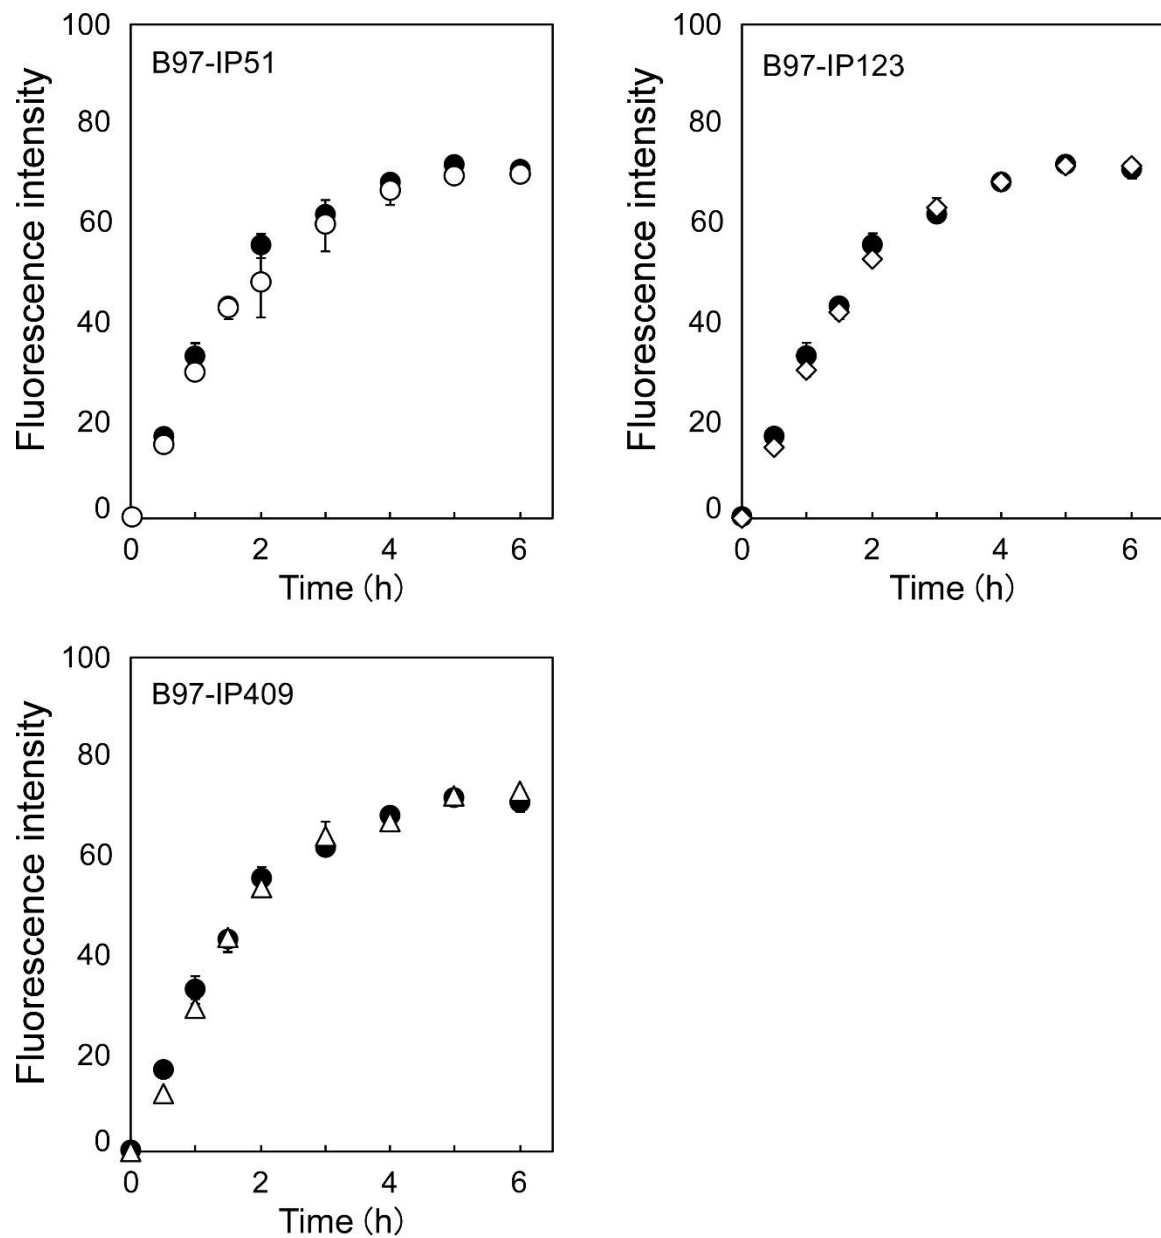

**Fig. S2** Time-dependent membrane permeability profiles of the original culture insert (closed circle) as the control, B97-IP51-coated insert (open circle), B97-IP123-coated insert (open diamond), and B97-IP409-coated insert (open triangle) at 37 °C. The initial fluorescence intensity of uranine solution of the under-membrane side was defined as 100. Data are expressed as the mean of 3 separate substrates with standard deviation.
